# Supplementary material
Source: PubMed Central journal article supplement (PMC4089958)

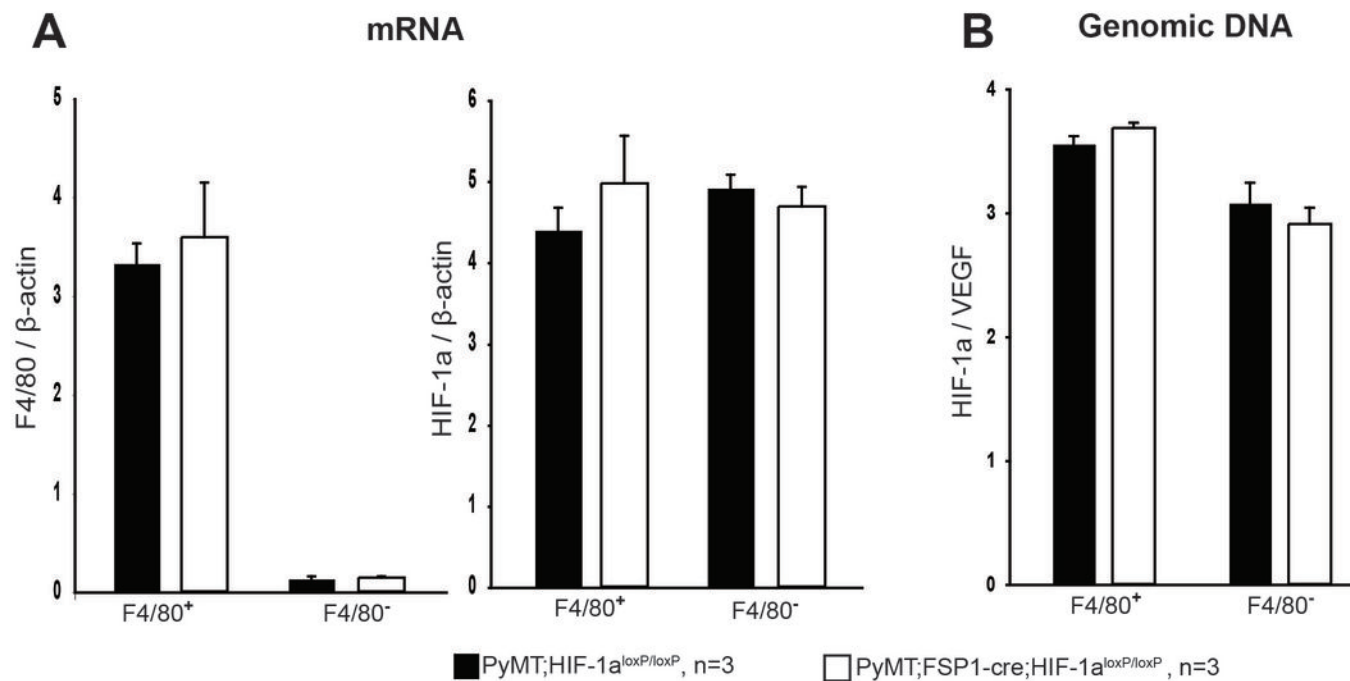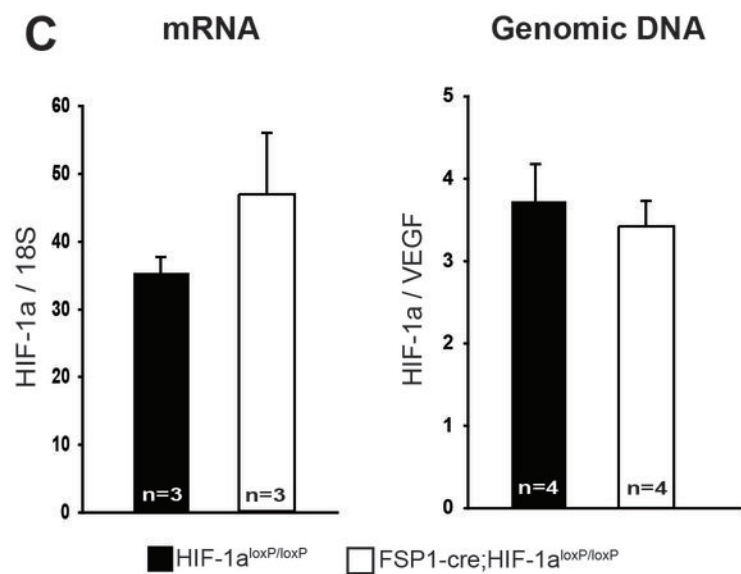

Supplement: NIHMS583823-supplement-01.pdf [file NIHMS583823-supplement-01.pdf]
